# Supplementary material for: Treatment of COVID-19 during the Acute Phase in Hospitalized Patients Decreases Post-Acute Sequelae of COVID-19
Source: MDPI journal article supplement (doi:10.3390/jcm12124158), 2023-06-20
Supplement: s1 [file s1]

# Supplementary Materials

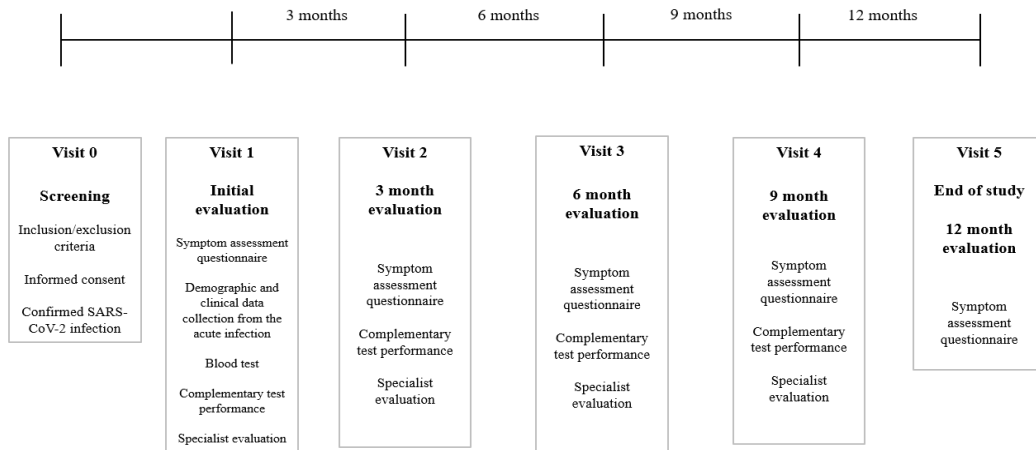

**Figure S1.** Follow-up protocol.

**Table S1.** Standardized symptom assessment questionnaire after SARS-CoV-2 infection.

| Questions                                                 | YES | NO |
|-----------------------------------------------------------|-----|----|
| Do you have temperature > 37 °C?                          |     |    |
| Do you have anosmia or hyposmia?                          |     |    |
| Do you have ageusia or hypogeusia?                        |     |    |
| Do you have muscle pain?                                  |     |    |
| Do you have dyspnea?                                      |     |    |
| Do you feel fatigue?                                      |     |    |
| Do you have cough or expectoration?                       |     |    |
| Do you have orthopnea?                                    |     |    |
| Do you feel palpitations?                                 |     |    |
| Do you have chest pain?                                   |     |    |
| Do you have hair-loss?                                    |     |    |
| Do you have any skin alterations or mouth ulcers?         |     |    |
| Do you have any problems walking outdoors?                |     |    |
| Do you have any problems walking indoors?                 |     |    |
| Do you have any problems swallowing?                      |     |    |
| Do you have any headaches?                                |     |    |
| Do you feel dizzy or unstable?                            |     |    |
| Do you have memory loss?                                  |     |    |
| Do you have audition loss?                                |     |    |
| Do you feel anxious?                                      |     |    |
| Do you feel depressed?                                    |     |    |
| Do you feel loss of sensibility in any part of your body? |     |    |
| Do you find it difficult to return to your job?           |     |    |

**Table S2.** Outpatients laboratory results at follow-up (n=233).

| <b>Blood test data, mean (SD)*</b> | <b>Without PASC<br/>(n = 112)</b> | <b>With PASC<br/>(n = 121)</b> | <b>p value</b> |
|------------------------------------|-----------------------------------|--------------------------------|----------------|
| Creatinine (mg/dl)                 | 0.82 (0.19)                       | 0.79 (0.20)                    | 0.19           |
| Urea (mg/dl)                       | 32.44 (11.79)                     | 32.35 (11.28)                  | 0.96           |
| LDH (U/L)                          | 182.75 (34.58)                    | 179 (57.85)                    | 0.67           |
| Ferritin (ng/ml), median (p25-p75) | 74 (38-151)                       | 87 (34-169)                    | 0.38           |
| IL-6 (pg/ml), (p25-p75)            | 1.5 (1.5-3.0)                     | 1.7 (1.5-5.0)                  | 0.627          |
| CRP (mg/dl)                        | 1.01 (2.42)                       | 0.69 (2.09)                    | 0.34           |
| Total proteins (g/dl)              | 7.01 (0.49)                       | 7.09 (0.45)                    | 0.25           |
| ALT                                | 25.69 (27.22)                     | 24.41 (26.80)                  | 0.75           |

\*Data expressed as mean and standard deviation unless otherwise specified.  
Abbreviations: PASC, post-acute sequelae of COVID-19; LDH, Lactate dehydrogenase;  
IL-6, Interleukin 6; CRP, C-reactive protein.
